# Supplementary material for: Association of Subjective Quality and Quantity of Sleep with Quality of Life among a General Population
Source: MDPI journal article supplement (doi:10.3390/ijerph182312835), 2021-12-06
Supplement: s1 [file s1]

## Supplementary Material

**Table S1.** Demographic and clinical data between short, intermediate, and long sleep groups.

|                                                                                                                                                                              | Short sleep group<br>(N = 1,782) | Intermediate sleep<br>group<br>(N = 6,172) | Long sleep group<br>(N = 1,351) |
|------------------------------------------------------------------------------------------------------------------------------------------------------------------------------|----------------------------------|--------------------------------------------|---------------------------------|
| Age, median (range), year                                                                                                                                                    | 45 (20–69)                       | 45 (20–69)                                 | 45 (20–69)                      |
| Female, N (%)                                                                                                                                                                | 883 (49.6)                       | 3,042 (49.3)                               | 716 (53.0)                      |
| BMI, median (range), kg/m <sup>2</sup>                                                                                                                                       | 22.0 (10.2–50.4)                 | 21.6 (11.2–61)                             | 21.5 (15.6–52.1)                |
| Current smoker, N (%)                                                                                                                                                        | 407 (22.8)                       | 1,209 (19.6)                               | 216 (16.0)                      |
| Habitual alcohol ingestion, N (%)                                                                                                                                            | 880 (49.4)                       | 3,041 (49.3)                               | 620 (45.9)                      |
| Regular worker, N (%)                                                                                                                                                        | 1,107 (62.1)                     | 3,514 (56.9)                               | 571 (42.3)                      |
| Existence of currently treated diseases, N (%)                                                                                                                               | 511 (28.7)                       | 1,789 (29.0)                               | 438 (32.4)                      |
| Physical QOL (PCS), median (range), point                                                                                                                                    | 49.5 (14.1–67.5)                 | 50.2 (11.2–65.7)                           | 50.3 (10.8–70.6)                |
| Mental QOL (MCS), median (range), point                                                                                                                                      | 48.8 (13.1–65.2)                 | 50.3 (15.5–68.3)                           | 51.4 (10.6–70)                  |
| Difficulty initiating sleep (C2 in PSQI), median (range), point                                                                                                              | 1 (0–6)                          | 1 (0–6)                                    | 1 (0–6)                         |
| Difficulty maintaining sleep and/or waking up earlier than<br>desired (C5a in PSQI), median (range), point                                                                   | 0 (0–3)                          | 0 (0–3)                                    | 0 (0–3)                         |
| Sleep quality (C1 in PSQI), median (range), point                                                                                                                            | 1 (0–3)                          | 1 (0–3)                                    | 1 (0–3)                         |
| Habitual sleep duration, median (range), min                                                                                                                                 | 325.7 (180.0–355.7)              | 411.4 (360.0–475.7)                        | 488.6 (480–917.1)               |
| BMI, body mass index; QOL, quality of life; PCS, physical component summary of the SF-8; MCS, mental component summary of<br>the SF-8; PSQI, Pittsburgh Sleep Quality Index. |                                  |                                            |                                 |

**Table S2.** Model fit indices and standardized direct and indirect relations of variables between the entire sample and subgroups.

| Mediation model on physical QOL (A)                                                    |                      |                                     |                                            |                                    | Mediation model on Mental QOL (B)                                                      |                      |                                     |                                                   |                                          |
|----------------------------------------------------------------------------------------|----------------------|-------------------------------------|--------------------------------------------|------------------------------------|----------------------------------------------------------------------------------------|----------------------|-------------------------------------|---------------------------------------------------|------------------------------------------|
|                                                                                        | Total<br>(N = 9,305) | Short sleep<br>group<br>(N = 1,782) | Intermediate<br>sleep group<br>(N = 6,172) | Long sleep<br>group<br>(N = 1,351) |                                                                                        | Total<br>(N = 9,305) | Short sleep<br>group<br>(N = 1,782) | Intermedi<br>ate sleep<br>group<br>(N =<br>6,172) | Long<br>sleep<br>group<br>(N =<br>1,351) |
| Model Fit                                                                              |                      |                                     |                                            |                                    | Model Fit                                                                              |                      |                                     |                                                   |                                          |
| $\chi^2$                                                                               | 434.2                | 115.4                               | 300.1                                      | 99.5                               | $\chi^2$                                                                               | 434.2                | 111.8                               | 293.5                                             | 99.4                                     |
| RMSEA                                                                                  | 0.048                | 0.041                               | 0.046                                      | 0.047                              | RMSEA                                                                                  | 0.046                | 0.039                               | 0.045                                             | 0.046                                    |
| CFI                                                                                    | 0.955                | 0.950                               | 0.951                                      | 0.950                              | CFI                                                                                    | 0.958                | 0.957                               | 0.955                                             | 0.954                                    |
| NFI                                                                                    | 0.953                | 0.936                               | 0.948                                      | 0.935                              | NFI                                                                                    | 0.956                | 0.943                               | 0.952                                             | 0.940                                    |
| Path analysis                                                                          |                      |                                     |                                            |                                    | Path analysis                                                                          |                      |                                     |                                                   |                                          |
| Sleep Quality → Physical QOL                                                           |                      |                                     |                                            |                                    | Sleep Quality → Mental QOL                                                             |                      |                                     |                                                   |                                          |
| Direct association                                                                     | 0.203***             | 0.165***                            | 0.194***                                   | 0.267***                           | Direct association                                                                     | 0.169***             | 0.132***                            | 0.171***                                          | 0.188***                                 |
| Indirect association                                                                   | 0.041**              | 0.039                               | 0.044**                                    | -0.002                             | Indirect association                                                                   | 0.136***             | 0.156***                            | 0.154***                                          | 0.144***                                 |
| Sleep Duration → Physical QOL                                                          |                      |                                     |                                            |                                    | Sleep Duration → Mental QOL                                                            |                      |                                     |                                                   |                                          |
| Direct association                                                                     | -0.002               | 0.078***                            | 0.018                                      | -0.099***                          | Direct association                                                                     | 0.040***             | 0.040                               | 0.030*                                            | 0.027                                    |
| Indirect association                                                                   | -0.005**             | 0.002                               | -0.004**                                   | 0.000                              | Indirect association                                                                   | -0.017***            | 0.009                               | -0.011**                                          | -0.022**                                 |
| Insomnia symptoms → Physical QOL                                                       | -0.068***            | -0.075*                             | -0.073**                                   | 0.003                              | Insomnia symptoms → Mental QOL                                                         | -0.227***            | -0.296***                           | -0.202***                                         | -0.229***                                |
| Sleep quality → Insomnia symptoms                                                      | -0.598***            | -0.527***                           | -0.601***                                  | -0.631***                          | Sleep quality → Insomnia symptoms                                                      | -0.598***            | -0.526***                           | -0.600***                                         | -0.630***                                |
| Sleep duration → Insomnia symptoms                                                     | 0.077***             | -0.029                              | 0.053***                                   | 0.096***                           | Sleep duration → Insomnia symptoms                                                     | 0.077***             | -0.029                              | 0.053***                                          | 0.096***                                 |
| Difficulty initiating sleep → Insomnia symptoms                                        | 0.677***             | 0.688***                            | 0.658***                                   | 0.644***                           | Difficulty initiating sleep → Insomnia symptoms                                        | 0.675***             | 0.683***                            | 0.659***                                          | 0.647***                                 |
| Difficulty maintaining sleep and/or waking up earlier than desired → Insomnia symptoms | 0.571***             | 0.691***                            | 0.551***                                   | 0.526***                           | Difficulty maintaining sleep and/or waking up earlier than desired → Insomnia symptoms | 0.572***             | 0.693***                            | 0.550***                                          | 0.522***                                 |

RMSEA, root mean square error of approximation; NFI, non-normed fit index; CFI, comparative fit index; QOL, quality of life. \* $p < 0.05$ , \*\* $p < 0.01$ , \*\*\* $p < 0.001$ .
